# Supplementary material for: 3D inverted colloidal crystals in realistic cell migration assays for drug screening applications
Source: Royal Society of Chemistry journal article supplement (doi:10.1039/c1ib00065a), 2011-10-31
Supplement: c1ib00065a.pdf [file c1ib00065a.pdf]

Table S1. Supplementary information on underlying experiments presented in Figure 2a – d.

| Data group                   | Experiment #       | Total cell count | Mean migration [ $\mu\text{m}$ ] |
|------------------------------|--------------------|------------------|----------------------------------|
| Figure 2a, 10 kPa            | 1,2,3              | 1504             | 12.4                             |
| Figure 2a, 3.2 kPa           | 1,2,3              | 2122             | 16.0                             |
| Figure 2b, Control           | 4,5,6              | 2049             | 12.5                             |
| Figure 2b, Nocodazole        | 4,5,6              | 1347             | 9.3                              |
| Figure 2c, Control           | 7,8,9              | 1445             | 12.5                             |
| Figure 2c, Phalloidin        | 7,8,9              | 1405             | 12.0                             |
| Figure 2d, Control 10 kPa    | 10, 11, 12, 13, 14 | 379              | 11.4                             |
| Figure 2d, 3.2 kPa           | 10, 11, 12, 13, 14 | 274              | 11.9                             |
| Figure 2d, Nocodazole 10 kPa | 10, 11, 13         | 125              | 14.7                             |
| Figure 2d, Phalloidin 10 kPa | 10, 11, 13         | 174              | 12.8                             |
